# Supplementary material for: Proprotein Convertase Subtilisin/Kexin 9 (PCSK9) Promotes Macrophage Activation via LDL Receptor-Independent Mechanisms
Source: PubMed Central journal article supplement — Circ Res. 2022 Oct 20;131(11):873–89. doi: 10.1161/CIRCRESAHA.121.320056 (PMC9973449; doi:10.1161/circresaha.121.320056), 2022-10-20
Supplement: res-131-873-s002.pdf [file res-131-873-s002.pdf]

## Major Resources Table

In order to allow validation and replication of experiments, all essential research materials listed in the Methods should be included in the Major Resources Table below. Authors are encouraged to use public repositories for protocols, data, code, and other materials and provide persistent identifiers and/or links to repositories when available. Authors may add or delete rows as needed.

### Animals (in vivo studies)

| Species                         | Vendor or Source   | Background Strain | Sex  | Persistent ID / URL                                                               |
|---------------------------------|--------------------|-------------------|------|-----------------------------------------------------------------------------------|
| C57BL/6J wild-type mice         | Jackson Laboratory | C57BL/6J          | Male | <a href="https://www.jax.org/strain/000664">https://www.jax.org/strain/000664</a> |
| <i>Ldlr</i> <sup>-/-</sup> mice | Jackson Laboratory | C57BL/6J          | Male | <a href="https://www.jax.org/strain/002207">https://www.jax.org/strain/002207</a> |

### Antibodies

| Target antigen                                         | Vendor or Source         | Catalog # | Working concentration | Persistent ID / URL                                                                                                                                                                                                                                                                                                                                           |
|--------------------------------------------------------|--------------------------|-----------|-----------------------|---------------------------------------------------------------------------------------------------------------------------------------------------------------------------------------------------------------------------------------------------------------------------------------------------------------------------------------------------------------|
| $\alpha$ SMA                                           | Abcam                    | ab5694    | 1:500 IHC             | <a href="https://www.abcam.co.jp/alpha-smooth-muscle-actin-antibody-ab5694.html">https://www.abcam.co.jp/alpha-smooth-muscle-actin-antibody-ab5694.html</a>                                                                                                                                                                                                   |
| Mac3                                                   | BD Biosciences           | 550292    | 1:50 IHC              | <a href="https://www.bdbiosciences.com/ja-jp/products/reagents/flow-cytometry-reagents/research-reagents/single-color-antibodies-ruo/purified-rat-anti-mouse-cd107b.550292">https://www.bdbiosciences.com/ja-jp/products/reagents/flow-cytometry-reagents/research-reagents/single-color-antibodies-ruo/purified-rat-anti-mouse-cd107b.550292</a>             |
| Mac3                                                   | BD Biosciences           | 553322    | 1:800 IF              | <a href="https://www.bdbiosciences.com/content/dam/bdb/products/global/reagents/flow-cytometry-reagents/research-reagents/single-color-antibodies-ruo/553322_base/pdf/553322.pdf">https://www.bdbiosciences.com/content/dam/bdb/products/global/reagents/flow-cytometry-reagents/research-reagents/single-color-antibodies-ruo/553322_base/pdf/553322.pdf</a> |
| Ki-67                                                  | Abcam                    | ab15580   | 1:200 IF              | <a href="https://www.abcam.com/Ki67-antibody-ab15580.html?gclid=Cj0KCQjwidS WBhDdARIsAloTVb31WMFNHg7HpiD1KWd7AjMO-ABVaDn3bGkkR4Ej62MSkIS3FMyUjSAaAmo2EALw_wcB">https://www.abcam.com/Ki67-antibody-ab15580.html?gclid=Cj0KCQjwidS WBhDdARIsAloTVb31WMFNHg7HpiD1KWd7AjMO-ABVaDn3bGkkR4Ej62MSkIS3FMyUjSAaAmo2EALw_wcB</a>                                       |
| PE-conjugated anti-F4/80 antibody                      | Biolegend                | 123110    | 1ul/test sorting      | <a href="https://www.biolegend.com/fr-fr/products/pe-anti-mouse-f4-80-antibody-4068">https://www.biolegend.com/fr-fr/products/pe-anti-mouse-f4-80-antibody-4068</a>                                                                                                                                                                                           |
| Alexa Flour anti-rat 488-labeled secondary antibody    | Thermo Fisher Scientific | A-11006   | 1:300 IF              | <a href="https://www.thermofisher.com/antibody/product/Goat-anti-Rat-IgG-H-L-Cross-Adsorbed-Secondary-Antibody-Polyclonal/A-11006">https://www.thermofisher.com/antibody/product/Goat-anti-Rat-IgG-H-L-Cross-Adsorbed-Secondary-Antibody-Polyclonal/A-11006</a>                                                                                               |
| Alexa Flour anti-rabbit 568-labeled secondary antibody | Thermo Fisher Scientific | A-11011   | 1:500 IF              | <a href="https://www.thermofisher.com/antibody/product/Goat-anti-Rabbit-IgG-H-L-Cross-Adsorbed-Secondary-Antibody-Polyclonal/A-11011">https://www.thermofisher.com/antibody/product/Goat-anti-Rabbit-IgG-H-L-Cross-Adsorbed-Secondary-Antibody-Polyclonal/A-11011</a>                                                                                         |
| PCSK9                                                  | Abcam                    | ab31762   | 50ug/test             | <a href="https://www.abcam.com/pcsk9-antibody-ab31762.html">https://www.abcam.com/pcsk9-antibody-ab31762.html</a>                                                                                                                                                                                                                                             |
| PCSK9                                                  | R&D Systems              | AF3985    | 2ug/ml                | <a href="https://www.rndsystems.com/products/mouse-rat-proprotein-convertase-9-pcsk9-antibody_af3985">https://www.rndsystems.com/products/mouse-rat-proprotein-convertase-9-pcsk9-antibody_af3985</a>                                                                                                                                                         |

|                                                  |                          |           |           |                                                                                                                                                                                                                                                                                                                                                                                                         |
|--------------------------------------------------|--------------------------|-----------|-----------|---------------------------------------------------------------------------------------------------------------------------------------------------------------------------------------------------------------------------------------------------------------------------------------------------------------------------------------------------------------------------------------------------------|
| SDC4                                             | Thermo Fisher Scientific | PA1-32485 | 50ug/test | <a href="https://www.thermofisher.com/antibody/product/Syndecan-4-Antibody-Polyclonal/PA1-32485">https://www.thermofisher.com/antibody/product/Syndecan-4-Antibody-Polyclonal/PA1-32485</a>                                                                                                                                                                                                             |
| Purified Rabbit Polyclonal Isotype Ctrl Antibody | Biolegend                | 910801    | 50ug/test | <a href="https://www.biolegend.com/de-de/products/purified-rabbit-polyclonal-isotype-ctrl-antibody-11604">https://www.biolegend.com/de-de/products/purified-rabbit-polyclonal-isotype-ctrl-antibody-11604</a>                                                                                                                                                                                           |
| Goat IgG HRP-conjugated Antibody                 | R&D Systems              | HAF017    | 1:1000    | <a href="https://www.rndsystems.com/products/goat-igg-hrp-conjugated-antibody_haf017?gclid=Cj0KCQjwidSWBhDdARIsAloTVbOprQycjhFbTwMsDxIUQAFuCJD-4jZEn2ntQEBn-Fbh129Jv-Zk4aAurNEALw_wcB&amp;gclid=aw.ds">https://www.rndsystems.com/products/goat-igg-hrp-conjugated-antibody_haf017?gclid=Cj0KCQjwidSWBhDdARIsAloTVbOprQycjhFbTwMsDxIUQAFuCJD-4jZEn2ntQEBn-Fbh129Jv-Zk4aAurNEALw_wcB&amp;gclid=aw.ds</a> |
| PECAM-1                                          | BD Biosciences           | 557355    | 1:12.5    | <a href="https://wwwbdbiosciences.com/en-us/products/reagents/flow-cytometry-reagents/research-reagents/single-color-antibodies-ruo/purified-rat-anti-mouse-cd31.557355">https://wwwbdbiosciences.com/en-us/products/reagents/flow-cytometry-reagents/research-reagents/single-color-antibodies-ruo/purified-rat-anti-mouse-cd31.557355</a>                                                             |

### Cultured Cells

| Name                                               | Vendor or Source                                            | Sex (F, M, or unknown) | Persistent ID / URL                                                                                                                                                                                                                                                                                                                                                                                                                                                         |
|----------------------------------------------------|-------------------------------------------------------------|------------------------|-----------------------------------------------------------------------------------------------------------------------------------------------------------------------------------------------------------------------------------------------------------------------------------------------------------------------------------------------------------------------------------------------------------------------------------------------------------------------------|
| Mouse primary peritoneal macrophages               | Primary cells isolated from <i>Ldlr</i> <sup>-/-</sup> mice | M                      |                                                                                                                                                                                                                                                                                                                                                                                                                                                                             |
| Mouse bone marrow derived macrophages              | Primary cells isolated from <i>Ldlr</i> <sup>-/-</sup> mice | M                      |                                                                                                                                                                                                                                                                                                                                                                                                                                                                             |
| THP-1 cells                                        | ATCC                                                        | Unknown                | <a href="https://www.atcc.org/products/tib-202?matchtype=e&amp;network=g&amp;device=c&amp;adposition=&amp;keyword=thp%201%20cells&amp;gclid=Cj0KCQjwidSWBhDdARIsAloTVb195fqpe9KrhOK3UYig1cNjE2YgoYPOKN4qkIPSODx7UyruNsgXTsaAiKbEALw_wcB">https://www.atcc.org/products/tib-202?matchtype=e&amp;network=g&amp;device=c&amp;adposition=&amp;keyword=thp%201%20cells&amp;gclid=Cj0KCQjwidSWBhDdARIsAloTVb195fqpe9KrhOK3UYig1cNjE2YgoYPOKN4qkIPSODx7UyruNsgXTsaAiKbEALw_wcB</a> |
| Human saphenous vein endothelial cells (HSVECs)    | Primary cells                                               | Unknown                |                                                                                                                                                                                                                                                                                                                                                                                                                                                                             |
| Human saphenous vein smooth muscle cells (HSVSMCs) | Primary cells                                               | Unknown                |                                                                                                                                                                                                                                                                                                                                                                                                                                                                             |
| Transforming competent cells                       | Invitrogen                                                  | Unknown                | <a href="https://www.fishersci.com/shop/products/invitrogen-mach1-t1-phage-resistant-chemically-competent-i-e-coli-i/C862003">https://www.fishersci.com/shop/products/invitrogen-mach1-t1-phage-resistant-chemically-competent-i-e-coli-i/C862003</a>                                                                                                                                                                                                                       |

### Data & Code Availability

| Description          | Source / Repository | Persistent ID / URL |
|----------------------|---------------------|---------------------|
| Total RNA sequencing | GEO                 | GSE209669           |

### Other

| Description | Source / Repository | Persistent ID / URL |
|-------------|---------------------|---------------------|
|             |                     |                     |

DOI [to be added]

|                                                         |                          |                                                                                                                                                                                                                                                                                                                                                                                                                                                                     |
|---------------------------------------------------------|--------------------------|---------------------------------------------------------------------------------------------------------------------------------------------------------------------------------------------------------------------------------------------------------------------------------------------------------------------------------------------------------------------------------------------------------------------------------------------------------------------|
| BrdU-TUNEL Assay                                        | Invitrogen               | <a href="https://www.thermofisher.com/order/catalog/product/A23210">https://www.thermofisher.com/order/catalog/product/A23210</a>                                                                                                                                                                                                                                                                                                                                   |
| Oil Red O solution                                      | Sigma                    | <a href="https://www.sigmaaldrich.com/US/en/product/mm/102419">https://www.sigmaaldrich.com/US/en/product/mm/102419</a>                                                                                                                                                                                                                                                                                                                                             |
| mouse cholesterol ELISA kit                             | Wako                     | <a href="https://labchem-wako.fujifilm.com/us/product/detail/W01S10LABCHO-M1.html">https://labchem-wako.fujifilm.com/us/product/detail/W01S10LABCHO-M1.html</a>                                                                                                                                                                                                                                                                                                     |
| mouse triglycerides ELISA kit                           | Wako                     | <a href="https://labchem-wako.fujifilm.com/us/product/detail/W01S10LABTRIG-M1.html">https://labchem-wako.fujifilm.com/us/product/detail/W01S10LABTRIG-M1.html</a>                                                                                                                                                                                                                                                                                                   |
| mouse PCSK9 ELISA kit                                   | R&D Systems              | <a href="https://www.rndsystems.com/products/mouse-proprotein-convertase-9-pcsk9-quantikine-elisa-kit_mpc900">https://www.rndsystems.com/products/mouse-proprotein-convertase-9-pcsk9-quantikine-elisa-kit_mpc900</a>                                                                                                                                                                                                                                               |
| pAAV/D377Y-mPCSK9                                       | Addgene                  | <a href="https://www.addgene.org/58376/">https://www.addgene.org/58376/</a>                                                                                                                                                                                                                                                                                                                                                                                         |
| pAAV-LacZ control plasmid                               | Cell Biolabs             | <a href="https://www.cellbiolabs.com/paav-lacz-control-plasmid">https://www.cellbiolabs.com/paav-lacz-control-plasmid</a>                                                                                                                                                                                                                                                                                                                                           |
| QIAquick Gel Extraction kit                             | QIAGEN                   | <a href="https://www.qiagen.com/us/products/discovery-and-translational-research/dna-rna-purification/dna-purification/dna-clean-up/qiaquick-gel-extraction-kit/">https://www.qiagen.com/us/products/discovery-and-translational-research/dna-rna-purification/dna-purification/dna-clean-up/qiaquick-gel-extraction-kit/</a>                                                                                                                                       |
| QIAprep Spin Miniprep kit                               | QIAGEN                   | <a href="https://www.qiagen.com/us/products/discovery-and-translational-research/dna-rna-purification/dna-purification/plasmid-dna/qiaprep-spin-miniprep-kit/">https://www.qiagen.com/us/products/discovery-and-translational-research/dna-rna-purification/dna-purification/plasmid-dna/qiaprep-spin-miniprep-kit/</a>                                                                                                                                             |
| QIAfilter Plasmid Maxi kit                              | QIAGEN                   | <a href="https://www.qiagen.com/us/products/discovery-and-translational-research/dna-rna-purification/dna-purification/plasmid-dna/qiafilter-plasmid-kits/">https://www.qiagen.com/us/products/discovery-and-translational-research/dna-rna-purification/dna-purification/plasmid-dna/qiafilter-plasmid-kits/</a>                                                                                                                                                   |
| Aminospark 750                                          | PerkinElmer              | <a href="https://resources.perkinelmer.com/corporate/content/tdlotsheet/nev10143-aminospark750-td.pdf">https://resources.perkinelmer.com/corporate/content/tdlotsheet/nev10143-aminospark750-td.pdf</a>                                                                                                                                                                                                                                                             |
| MMP sense 680                                           | PerkinElmer              | <a href="https://www.perkinelmer.com/product/ivisense-mmp-680-nev10126">https://www.perkinelmer.com/product/ivisense-mmp-680-nev10126</a>                                                                                                                                                                                                                                                                                                                           |
| RNAscope® 2.5 HD Reagent Kit-RED                        | ACDBio                   | <a href="https://acdbio.com/rnascope-25-hd-assay%E2%80%94red">https://acdbio.com/rnascope-25-hd-assay%E2%80%94red</a>                                                                                                                                                                                                                                                                                                                                               |
| Prolong Gold anti-fade reagent with DAPI                | Thermo Fisher Scientific | <a href="https://www.thermofisher.com/order/catalog/product/P36931">https://www.thermofisher.com/order/catalog/product/P36931</a>                                                                                                                                                                                                                                                                                                                                   |
| F4/80-positive macrophages EasySep system               | StemCell Technologies    | <a href="https://www.stemcell.com/easysep-mouse-f4-80-positive-selection-kit.html">https://www.stemcell.com/easysep-mouse-f4-80-positive-selection-kit.html</a>                                                                                                                                                                                                                                                                                                     |
| illustra RNAspin Mini kit                               | GE Healthcare            | <a href="https://labettor.com/combo/detail/id/2952/">https://labettor.com/combo/detail/id/2952/</a>                                                                                                                                                                                                                                                                                                                                                                 |
| High Capacity cDNA Reverse Transcription Kit            | Thermo Fisher Scientific | <a href="https://www.thermofisher.com/order/catalog/product/4374966">https://www.thermofisher.com/order/catalog/product/4374966</a>                                                                                                                                                                                                                                                                                                                                 |
| EasyQuick RT MasterMix                                  | CWbio                    | <a href="https://www.cwbiosciences.com/uploads/20190611/f7d0b821cfca1f966d689709a81fabb0.pdf">https://www.cwbiosciences.com/uploads/20190611/f7d0b821cfca1f966d689709a81fabb0.pdf</a>                                                                                                                                                                                                                                                                               |
| Recombinant Mouse Proprotein Convertase 9/PCSK9 Protein | R&D Systems              | <a href="https://www.rndsystems.com/products/recombinant-mouse-proprotein-convertase-9-pcsk9-protein-cf_9258-se?gclid=Cj0KCQjwidSWBhDdARIsAloTVb3BWCYPoeymOKRrh3CjoWfvgsXkfPsUa3umqXd6EMz0Tm5dk003V-kaAoQEEALw_wcB&amp;gclsrc=aw.ds">https://www.rndsystems.com/products/recombinant-mouse-proprotein-convertase-9-pcsk9-protein-cf_9258-se?gclid=Cj0KCQjwidSWBhDdARIsAloTVb3BWCYPoeymOKRrh3CjoWfvgsXkfPsUa3umqXd6EMz0Tm5dk003V-kaAoQEEALw_wcB&amp;gclsrc=aw.ds</a> |
| Recombinant Mouse Syndecan-4 Protein                    | R&D Systems              | <a href="https://www.rndsystems.com/products/recombinant-mouse-syndecan-4-protein-cf_6267-sd">https://www.rndsystems.com/products/recombinant-mouse-syndecan-4-protein-cf_6267-sd</a>                                                                                                                                                                                                                                                                               |

|                                                                    |                          |                                                                                                                                                                                                                                                                                                                                                                                                                             |
|--------------------------------------------------------------------|--------------------------|-----------------------------------------------------------------------------------------------------------------------------------------------------------------------------------------------------------------------------------------------------------------------------------------------------------------------------------------------------------------------------------------------------------------------------|
| Recombinant Mouse M-CSF Protein                                    | R&D Systems              | <a href="https://www.rndsystems.com/products/recombinant-mouse-m-csf-protein_416-ml">https://www.rndsystems.com/products/recombinant-mouse-m-csf-protein_416-ml</a>                                                                                                                                                                                                                                                         |
| Lipofectamine™ RNAiMAX Transfection Reagent                        | Thermo Fisher Scientific | <a href="https://www.thermofisher.com/order/catalog/product/13778075">https://www.thermofisher.com/order/catalog/product/13778075</a>                                                                                                                                                                                                                                                                                       |
| TPCA 1, IkappaB kinase inhibitor                                   | Abcam                    | <a href="https://www.abcam.com/tpca-1-ikappab-kinase-inhibitor-ab145522.html">https://www.abcam.com/tpca-1-ikappab-kinase-inhibitor-ab145522.html</a>                                                                                                                                                                                                                                                                       |
| Chromogenic LAL Endotoxin Assay kit                                | GenScript                | <a href="https://www.genscript.com/kit/L00350-ToxinSensor_Chromogenic_LAL_Endotoxin_Assay_Kit.html">https://www.genscript.com/kit/L00350-ToxinSensor_Chromogenic_LAL_Endotoxin_Assay_Kit.html</a>                                                                                                                                                                                                                           |
| Recombinant Human MCP-1 (CCL2)                                     | R&D Systems              | <a href="https://www.rndsystems.com/products/recombinant-human-ccl2-mcp-1-protein_279-mc">https://www.rndsystems.com/products/recombinant-human-ccl2-mcp-1-protein_279-mc</a>                                                                                                                                                                                                                                               |
| Recombinant human PCSK9                                            | R&D Systems              | <a href="https://www.rndsystems.com/products/recombinant-human-proprotein-convertase-9-pcsk9-protein-cf_3888-se">https://www.rndsystems.com/products/recombinant-human-proprotein-convertase-9-pcsk9-protein-cf_3888-se</a>                                                                                                                                                                                                 |
| Low Density Lipoprotein from Human Plasma, oxidized, Dil conjugate | Thermo Fisher Scientific | <a href="https://www.thermofisher.com/order/catalog/product/L34358">https://www.thermofisher.com/order/catalog/product/L34358</a>                                                                                                                                                                                                                                                                                           |
| Pierce™ Co-Immunoprecipitation Kit                                 | Thermo Fisher Scientific | <a href="https://www.thermofisher.com/order/catalog/product/26149">https://www.thermofisher.com/order/catalog/product/26149</a>                                                                                                                                                                                                                                                                                             |
| Corning Matrigel Invasion Chamber 24 well plate 8.0 micron         | Corning                  | <a href="https://ecatalog.corning.com/life-sciences/b2c/US/en/Permeable-Supports/Inserts/Corning%20AE-BioCoat%20AE-Cell-Environments-and-Corning-BioCoat-Matrigel%20AE-Invasion-Chambers,-PET-Membrane/p/354480">https://ecatalog.corning.com/life-sciences/b2c/US/en/Permeable-Supports/Inserts/Corning%20AE-BioCoat%20AE-Cell-Environments-and-Corning-BioCoat-Matrigel%20AE-Invasion-Chambers,-PET-Membrane/p/354480</a> |
